# Supplementary material for: High protein ingestion does not affect whole-body insulin sensitivity
Source: Research Square preprint supplement (doi:10.21203/rs.3.rs-6555791/v1), 2025-05-30
Supplement: Supplementary file 2 [file 4c22adfb253dd652804e63e0.docx]

Figure 2. Plasma amino acid concentrations of individuals with obesity after ingestion of different protein-containing meals for Branched-chain amino acids (BCAA) and individual BCAA), Abbreviations: MPDAF (a), moderate protein dose and added fat; MPD (b), moderate protein dose; HPD (c), high protein dose. n= 9 for each group. Data expressed as mean ± SEM. Trial*0min represents significant difference in the specified time interval compared to baseline values (0 min). Trial*trial represents significant difference between the specified trials at the marked time point.

Supplementary Figure 3. Plasma BCAA AUC of individuals with obesity after ingestion of different protein-containing meals for individual Branched-chain amino acids (BCAAs) or combined, Abbreviations: MPDAF, moderate protein dose and added fat; MPD, moderate protein dose; HPD, high protein dose. n= 9 for each group. Data expressed as mean ± SEM.
