# Supplementary material for: High protein ingestion does not affect whole-body insulin sensitivity
Source: Research Square preprint supplement (doi:10.21203/rs.3.rs-6555791/v1), 2025-05-30
Supplement: Supplementary file 3 [file ba4e45b764663ce00770ace6.docx]

**Supplementary Table 1. Example of diets for both groups*****1*(0-18 Week Study)**

|  | **Control** | **HP** |
| --- | --- | --- |
| Macronutrient content (% of energy) | | |
| Carbohydrates | 55 | 40–45 |
| Protein | 15 | 25–30 |
| Fat | 30 | 30 |
| Cereal fiber | Not emphasized | Emphasized |
| Emphasized foods*[3](https://www.sciencedirect.com/science/article/pii/S000291652302350X?via%3Dihub" \l "note7)* | Bread (both refined and whole-meal bread products), fruit, legumes, pasta, potatoes, rice (both polished and brown rice products), vegetables | Legumes, low-fat dairy products (low-fat milk, cheese, yogurt, low-fat curd cheese), low-fat meat (especially poultry) and fish, low-fat sausages (eg, ham, chicken breast), vegetables |
| Moderate intake | Low-fat dairy products (milk, cheese, yogurt, curd cheese), low-fat sausages (eg, ham, chicken breast), low-fat meat (poultry, fish) | Fruit, pasta, polished rice, potatoes, wheat and rye bread |
| Restricted | High-fat meat and sausages (eg, salami, pork sausage, roast pork), jam, honey, spread (butter, margarine), sweets, snacks | High-fat meat and sausages (eg, salami, pork sausage, roast pork), jam, honey, spread (butter, margarine), sweets, snacks |
| Emphasized beverages | Water, tea, coffee | Water, tea, coffee |
| Calculated energy intake from 3-d food protocols after 6 wk (kcal/d)2 | 2007 ± 101 | 1971 ± 112 |
| Supplements | Basic supplement (carbohydrates, protein, fat, and cereal fiber): 2 × 28, 8, 3, and 1 g | Basic supplement enriched with 2 × 29 g protein isolates of whey and peas (carbohydrates, protein, fat, and cereal fiber): 2 × 25, 29, 3, and 1 g |

1. Participants in both dietary groups received individual one-on-one dietary advice in the metabolic unit at weeks 0, 3, and 6 of the intervention, supported by additional telephone recalls at week 1. Daily food-frequency questionnaires were provided for the first 42 d, with direct analysis and feedback provided to the participants at weeks 3 and 6. Three-day food protocols were analyzed at weeks 0, 6, 12, and 18. Body weight and analyses of food protocols were used as markers for energy intake with direct analysis and feedback provided to the participants at weeks 3 and 6. Tailored dietary supplements were used in both groups as an additional tool to support the achievement of dietary targets. HP, diet high in protein; Control diet. Participants in the control group were instructed to consume a healthy low-fat, moderate-protein, and high-carbohydrate diet, as usually emphasized in current nutritional recommendations (American Diabetes Association, 2007). Both Control and HP diets were isoenergetic.
2. Calculated energy intake includes the consumption of dietary supplements twice daily in both groups. There were no differences in energy intake between groups (ANOVA, treatment × time interaction: *P* = 0.96).
3. All measurements were performed at weeks 0, 6, and 18.~~.~~ Magnet resonance imaging and H1 spectroscopy imaging studies were performed ± 1 wk before the respective study days at weeks 0, 6, and 18. Euglycemic-hyperinsulinemic clamps, adipose tissue biopsy samples, measures of body composition, and biomarkers were analyzed in all participants on the respective study days at weeks 0, 6, and 18 (*n* = 259 experiments, *n* = 18–22 participants/group and study day. Adipose tissue biopsy samples were collected from periumbilical subcutaneous adipose tissue 120 min before the euglycemic hyperinsulinemic clamp studies began. Blood and urine samples were collected on the respective study days at weeks 0, 3, 6, 12, and 18, immediately after the participants arrived in the metabolic unit.
