# Supplementary figures and images for: High protein ingestion does not affect whole-body insulin sensitivity
Source: Research Square preprint supplement (doi:10.21203/rs.3.rs-6555791/v1), 2025-05-30

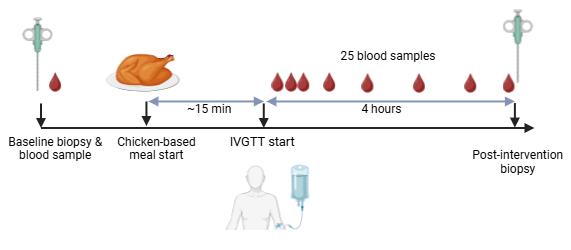


**Supplementary Figure 1**. Schematic timeline of the acute IVGTT study (not to scale)

Supplement: Supplementary file 1 [file 02dddbe43d8db52a910e7b4e.docx]
